# Supplementary material for: AAg3Ga8Se14 (A = Rb, Cs): second-harmonic generation responses realized through the parallel arrangement of AgSe4 and GaSe4 tetrahedrons
Source: Royal Society of Chemistry journal article supplement (doi:10.1039/d2dt01614a), 2022-01-01
Supplement: d2dt01614a1.pdf [file d2dt01614a1.pdf]

## Supplementary Materials

### $A\text{Ag}_3\text{Ga}_8\text{Se}_{14}$ (A = Rb, Cs): Second-Harmonic Generation Responses Realized through the Parallel Arrangement of $\text{AgSe}_4$ and $\text{GaSe}_4$ Tetrahedrons

Zhi-Xin Qiu,<sup>a,b</sup> Shao-Min Pei,<sup>a</sup> Wen-Fa Chen,<sup>a</sup> Xiao-Ming Jiang,<sup>a</sup> Bin-Wen Liu<sup>a,\*</sup> and Guo-Cong Guo<sup>a,\*</sup>

<sup>a</sup> State Key Laboratory of Structural Chemistry, Fujian Institute of Research on the Structure of Matter, Chinese Academy of Sciences, Fuzhou, Fujian, 350002, P. R. China.

<sup>b</sup> Fujian Normal University, College of Chemistry and Materials science, Fuzhou, Fujian, 350007, P. R. China.

E-mails: [bwliu@fjirsm.ac.cn](mailto:bwliu@fjirsm.ac.cn) (B.-W. Liu), [gcguo@fjirsm.ac.cn](mailto:gcguo@fjirsm.ac.cn) (G.-C. Guo)

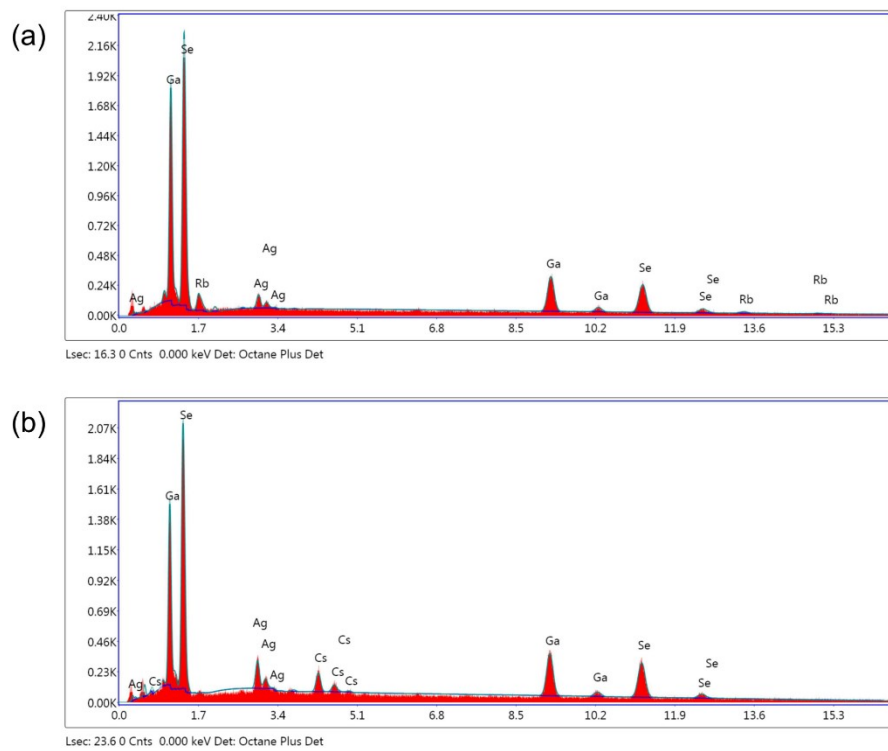

**Fig. S1** EDS spectra of  $\text{RbAg}_3\text{Ga}_8\text{Se}_{14}$  (**1**, a) and  $\text{CsAg}_3\text{Ga}_8\text{Se}_{14}$  (**2**, b).

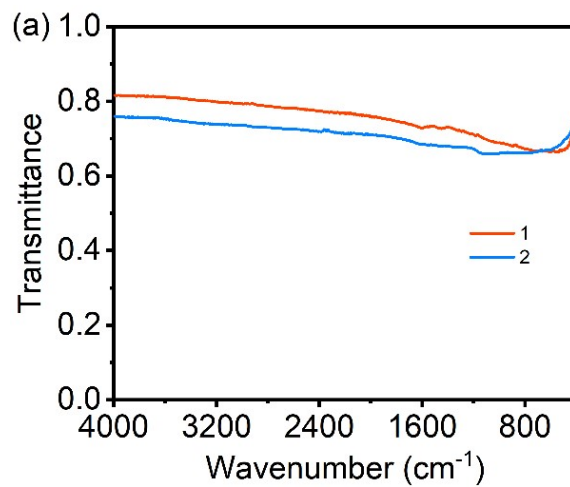

**Fig. S2** IR spectra of **1** and **2**.

**Table S1.** Fractional atomic coordinates ( $\times 10^4$ ) and equivalent isotropic displacement parameters ( $\text{\AA}^2 \times 10^3$ ) for **1** and **2**.  $U_{eq}$  is defined as 1/3 of the trace of the orthogonalised  $U_{IJ}$  tensor.

| <b>Compound 1</b> |             |            |             |          |
|-------------------|-------------|------------|-------------|----------|
| Atom              | <i>x</i>    | <i>y</i>   | <i>z</i>    | $U_{eq}$ |
| Rb1               | 6139.5(19)  | 10000      | 4239(3)     | 39.2(5)  |
| Ag1               | 9954.7(10)  | 10000      | 7189.8(14)  | 24.1(3)  |
| Ag2               | 2019.3(10)  | 10000      | 5173.6(14)  | 22.1(3)  |
| Ag3               | 7811.2(10)  | 10000      | 9617.2(14)  | 22.2(3)  |
| Ga1               | 7952.6(8)   | 6714.1(10) | 9447.6(11)  | 8.1(3)   |
| Ga2               | 5015.7(9)   | 8297.3(8)  | 7407.5(12)  | 7.7(2)   |
| Ga3               | 5927.7(8)   | 6650.2(10) | 1441.0(11)  | 8.1(2)   |
| Ga4               | 8994.6(9)   | 8358.3(9)  | 3501.1(13)  | 8.2(2)   |
| Se1               | 9993.8(8)   | 6643.9(8)  | 9951.9(10)  | 6.6(2)   |
| Se2               | 10000.1(12) | 10000      | 10000.0(15) | 9.7(3)   |
| Se3               | 7979.7(7)   | 6636.3(8)  | 1976.3(9)   | 6.7(2)   |
| Se4               | 2172.6(12)  | 10000      | 8049.5(14)  | 9.9(3)   |
| Se5               | 5938.7(8)   | 6912.6(9)  | 3887.7(11)  | 8.7(2)   |
| Se6               | 6973.2(8)   | 8240.6(10) | 7789.5(10)  | 8.9(2)   |
| Se7               | 8795.7(8)   | 8190.3(9)  | 5838.4(10)  | 8.3(2)   |
| Se8               | 7840.4(11)  | 10000      | 2298.8(15)  | 9.2(3)   |
| Se9               | 4255.6(11)  | 10000      | 5927.8(15)  | 8.3(3)   |
| <b>Compound 2</b> |             |            |             |          |
| Atom              | <i>x</i>    | <i>y</i>   | <i>z</i>    | $U_{eq}$ |
| Cs1               | 3948.9(10)  | 0          | 5890.3(13)  | 29.1(3)  |
| Ag1               | 49.6(11)    | 0          | 2826.2(16)  | 27.6(3)  |
| Ag2               | 7991.3(11)  | 0          | 4782.5(15)  | 24.6(3)  |
| Ag3               | 2166.8(10)  | 0          | 424.0(15)   | 25.1(3)  |
| Ga1               | 2045.1(9)   | 3283.4(9)  | 538.7(12)   | 10.9(3)  |
| Ga2               | 4984.4(10)  | 1704.9(8)  | 2580.6(14)  | 11.0(3)  |
| Ga3               | 4065.9(9)   | 3358.1(10) | 8548.4(11)  | 11.5(3)  |
| Ga4               | 994.2(10)   | 1632.9(10) | 6499.7(14)  | 10.9(3)  |
| Se1               | 5.9(8)      | 3338.6(8)  | 38.1(11)    | 10.0(2)  |
| Se2               | -18.2(12)   | 0          | 9.8(16)     | 13.1(3)  |
| Se3               | 2015.4(8)   | 3352.9(7)  | 8012.9(10)  | 9.9(2)   |
| Se4               | 7825.8(11)  | 0          | 1919.4(14)  | 12.9(3)  |
| Se5               | 4052.0(8)   | 3109.6(8)  | 6105.6(11)  | 11.8(2)  |
| Se6               | 3033.5(8)   | 1769.7(10) | 2207.4(10)  | 12.0(2)  |
| Se7               | 1196.4(8)   | 1811.4(8)  | 4166.4(11)  | 11.6(2)  |
| Se8               | 2129.3(11)  | 0          | 7736.6(15)  | 12.6(3)  |
| Se9               | 5764.9(12)  | 0          | 4019.6(15)  | 11.1(3)  |

**Table S2.** Selected bond lengths for **1** and **2**.

| <b>Compound 1</b> |                 |             |                 |
|-------------------|-----------------|-------------|-----------------|
| <b>Bond</b>       | <b>Length/Å</b> | <b>Bond</b> | <b>Length/Å</b> |
| Rb1–Se8           | 3.4650(2)       | Ag3–Se2     | 2.6832(7)       |
| Rb1–Se9           | 3.4810(2)       | Ga1–Se6     | 2.3620(6)       |
| Rb1–Se5×2         | 3.6382(1)       | Ga1–Se4     | 2.3834(3)       |
| Rb1–Se6×2         | 3.7320(2)       | Ga1–Se3     | 2.4314(5)       |
| Rb1–Se7×2         | 3.7360(2)       | Ga1–Se1     | 2.4603(2)       |
| Rb1–Se3×2         | 4.1470(2)       | Ga2–Se6     | 2.3882(4)       |
| Rb1–Se1×2         | 4.2010(1)       | Ga2–Se7     | 2.3896(4)       |
| Ag1–Se7           | 2.5928(2)       | Ga2–Se9     | 2.3995(2)       |
| Ag1–Se7           | 2.5928(2)       | Ga2–Se1     | 2.4739(4)       |
| Ag1–Se4           | 2.6042(8)       | Ga3–Se2     | 2.3760(3)       |
| Ag1–Se2           | 2.6920(2)       | Ga3–Se5     | 2.3795(4)       |
| Ag2–Se5           | 2.6443(1)       | Ga3–Se1     | 2.4485(6)       |
| Ag2–Se5           | 2.6443(1)       | Ga3–Se3     | 2.4645(3)       |
| Ag2–Se9           | 2.6463(6)       | Ga4–Se5     | 2.3900(4)       |
| Ag2–Se4           | 2.6986(7)       | Ga4–Se7     | 2.3933(4)       |
| Ag3–Se8           | 2.5764(6)       | Ga4–Se8     | 2.3974(3)       |
| Ag3–Se6           | 2.6192(3)       | Ga4–Se3     | 2.5022(4)       |
| Ag3–Se6           | 2.6193(3)       |             |                 |

  

| <b>Compound 2</b> |                 |             |                 |
|-------------------|-----------------|-------------|-----------------|
| <b>Bond</b>       | <b>Length/Å</b> | <b>Bond</b> | <b>Length/Å</b> |
| Cs1–Se8           | 3.5482(7)       | Ag3–Se2     | 2.6768(7)       |
| Cs1–Se9           | 3.5632(8)       | Ga1–Se6     | 2.3620(7)       |
| Cs1–Se5×2         | 3.6721(9)       | Ga1–Se4     | 2.3862(3)       |
| Cs1–Se6×2         | 3.8347(4)       | Ga1–Se3     | 2.4346(7)       |
| Cs1–Se7×2         | 3.8366(3)       | Ga1–Se1     | 2.4651(3)       |
| Cs1–Se3×2         | 4.0552(4)       | Ga2–Se6     | 2.3901(6)       |
| Cs1–Se1×2         | 4.1151(6)       | Ga2–Se7     | 2.3912(5)       |
| Ag1–Se7           | 2.5927(1)       | Ga2–Se9     | 2.3962(3)       |
| Ag1–Se7           | 2.5927(1)       | Ga2–Se1     | 2.4797(5)       |
| Ag1–Se4           | 2.6085(8)       | Ga3–Se2     | 2.3772(3)       |
| Ag1–Se2           | 2.6940(2)       | Ga3–Se5     | 2.3798(4)       |
| Ag2–Se5           | 2.6301(1)       | Ga3–Se1     | 2.4474(7)       |
| Ag2–Se5           | 2.6301(1)       | Ga3–Se3     | 2.4690(4)       |
| Ag2–Se9           | 2.6378(7)       | Ga4–Se5     | 2.3906(4)       |
| Ag2–Se4           | 2.6876(8)       | Ga4–Se8     | 2.3921(5)       |
| Ag3–Se8           | 2.5855(9)       | Ga4–Se7     | 2.4025(5)       |
| Ag3–Se6           | 2.6189(3)       | Ga4–Se3     | 2.5040(6)       |
| Ag3–Se6           | 2.6189(3)       |             |                 |
